# Supplementary material
Source: Royal Society of Chemistry journal article supplement (doi:10.1039/d6nj01450j)
Supplement: d6nj01450j1.pdf [file d6nj01450j1.pdf]

## Supplementary Information

### Mixed-halide engineering in a homopiperazinium hybrid salt: structural disorder description, electronic structure analysis, and bioactivity evaluation

Sandra Walha<sup>a,b</sup>, Mokhtar Hjiri<sup>c</sup> and Ali Ben Ahmed<sup>d,e\*</sup>

<sup>a</sup>University of Sfax, Faculty of Sciences of Sfax, Chemistry department, Laboratory Physical-Chemistry of Solid State, BP 1171, 3000 Sfax, Tunisia

<sup>b</sup>University of Gabes, Preparatory Institute for Engineering Studies of Gabes, Department of Chemical, Gabes 6029, Tunisia

<sup>c</sup>Imam Mohammad Ibn Saud Islamic University (IMSIU), College of Science, Physics Department, Riyadh, 11623, Saudi Arabia

<sup>d</sup>University of Sfax, Higher Institute of Biotechnology of Sfax, Department of Biomedical, BP 1175 - 3000 Sfax, Tunisia

<sup>e</sup>University of Sfax, Faculty of Sciences of Sfax, Department of Physics, Laboratory of Applied Physics, BP 1171, 3000, Sfax, Tunisia

\*Corresponding authors: [ali.benahmed@isbs.usf.tn](mailto:ali.benahmed@isbs.usf.tn) ; <https://orcid.org/0000-0001-8560-2630>

The occupied orbitals HOMO-2 and HOMO-1 are predominantly localized on the organic homopiperazinium cation, particularly around nitrogen atoms and adjacent carbon chains, indicating their participation in electron-donor behavior. In contrast, the unoccupied orbitals LUMO+1 and LUMO+2 exhibit stronger localization on the bromide/chloride sublattice, confirming the electron-acceptor role of the mixed halide environment. The progressive orbital delocalization observed near the frontier region supports the presence of ligand-to-halide charge-transfer transitions and explains the UV-active optical behavior of the compound.

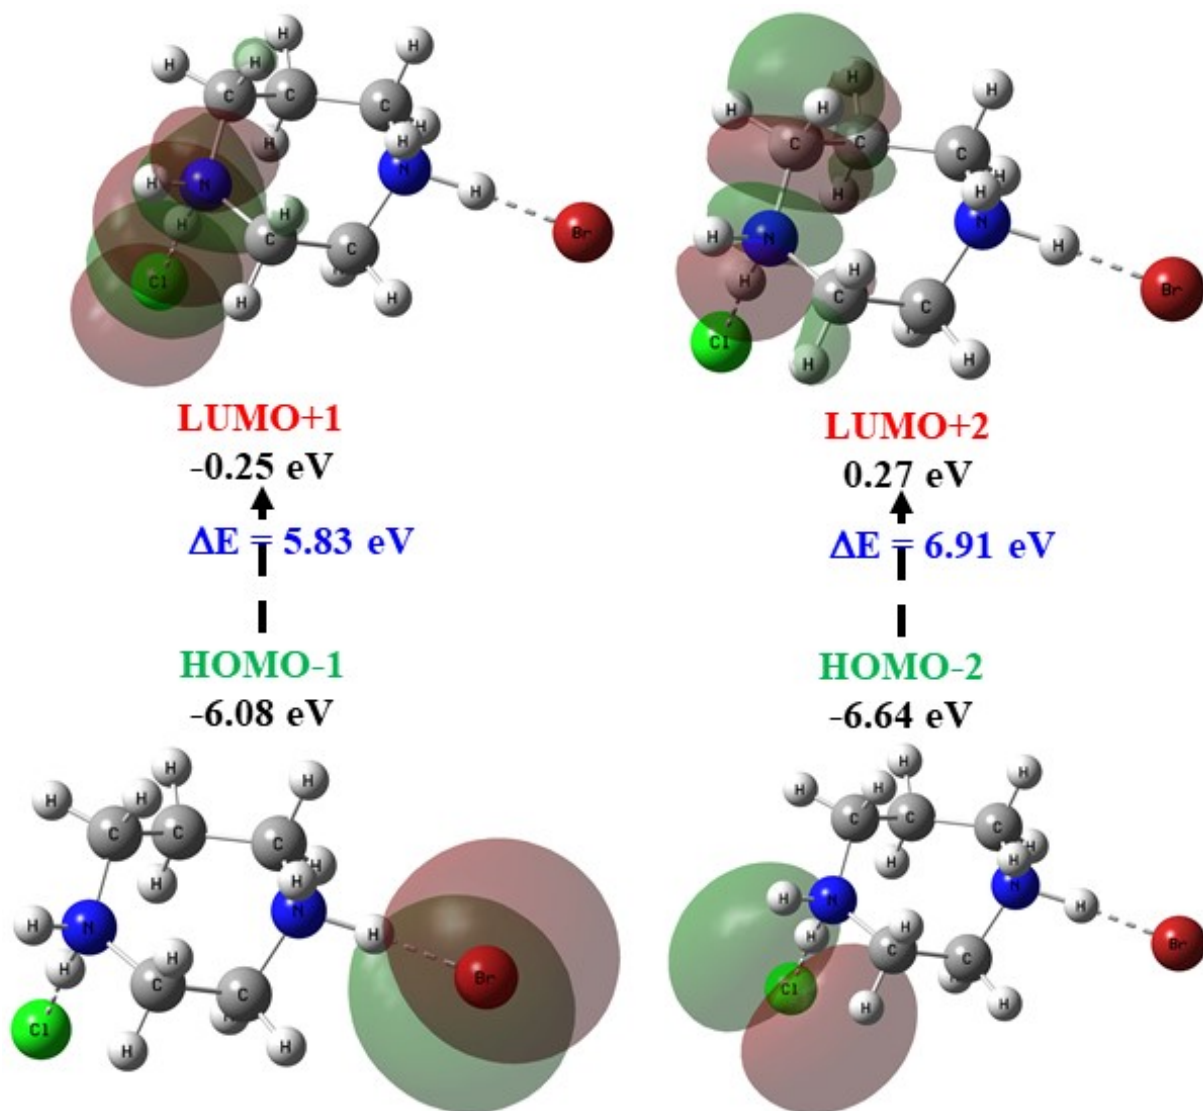

**Figure S1.** Frontier molecular orbitals of  $(\text{C}_5\text{H}_{14}\text{N}_2)\text{BrCl}$ : (a) HOMO-2, (b) HOMO-1, (c) HOMO, (d) LUMO, (e) LUMO+1, (f) LUMO+2.
